# Supplementary material
Source: PubMed Central journal article supplement (PMC4303059)

# Pharmacy Student Survey

During the course of your pharmacy education, have you ever had one of the following thoughts?

"Oh, well we never really covered that in class..."

"OK, so where do I find that information, exactly?"

"Ugh, this lecture again?"

The purpose of this survey is to avoid such questions - at least when it comes to antimicrobials. This survey will assess 4th year pharmacy students' knowledge and attitudes about antimicrobial use and resistance as well as the quantity and perceived quality of education about antimicrobials in a sample of US pharmacy schools. We ultimately hope to identify areas of potential improvement in pharmacy school curricula.

Your participation in this survey is completely voluntary and your decision of whether or not to participate will have absolutely no effect on your academic standing. Your responses will be anonymous (de-identified) and will only be seen individually by the study investigators. Responses will be aggregated for general release. This survey will not collect any personally identifiable data other than age, gender, and pharmacy school. We will try to make sure that the information we collect from you is kept private and used only for this research study. Completing this questionnaire will serve as your consent to take part in this research study.

The survey should take about 15-20 minutes to complete. Please take the survey only once. You must complete all the questions in order to receive a compensation email with a \$5 Amazon.com electronic gift card. However, you may stop this study at any time without any penalty to you.

We understand it is tempting to "look up answers," but PLEASE do not use references and answer honestly based on your current knowledge.

If you have any questions, please contact the principal investigator, Julie Ann Justo, PharmD, via email ([justoj@sccp.sc.edu](mailto:justoj@sccp.sc.edu)) or telephone (803-777-8855).

Thank you for your time and participation!

---

---

## Please tell us about yourself:

1 Which of the following pharmacy schools are you attending?

- Chicago State University
- Midwestern University
- Nova Southeastern University
- Palm Beach Atlantic University
- South Carolina College of Pharmacy
- Temple University
- University at Buffalo
- University of California San Francisco
- University of Illinois at Chicago
- University of Iowa
- University of Michigan
- University of Nebraska
- University of Washington
- Wayne State University

2 Tell us your age (please enter a number)

\_\_\_\_\_

3 Please tell us your gender

Female

Male

- 
- 
- 4 Which practice area of pharmacy are you considering?  
Please select all that apply
- Community
  - Hospital
  - Clinical (non-dispensing)
  - Compounding
  - Nuclear
  - Managed Care
  - Consultant
  - Pharmacy Administration
  - Academia
  - Pharmaceutical Industry
  - Other
  - Undecided
- 5 Are you considering pursuing post-graduate training  
(e.g. residency, fellowship)?
- Yes
  - No
- 5B If so, what type of post-graduate training are you  
considering? Please select all that apply
- PGY-1 Residency
  - PGY-2 Residency
  - Fellowship
  - Other
  - Undecided
- 5C Which specialty(ies) are you considering, if any?  
Please select all that apply
- Ambulatory Care
  - Cardiology
  - Critical Care
  - Emergency Medicine
  - Informatics
  - Infectious Diseases
  - Internal Medicine
  - Nutrition
  - Oncology
  - Pediatrics
  - Psychiatry
  - Transplant
  - Other
  - Undecided

- 6 Have you had any research experience or pharmacology education regarding antimicrobials prior to entering pharmacy school?  Yes  No

---



---

**7. Tell us how much you Agree or Disagree with each of the following statements**

|                                                                                                                                                     | Strongly Agree           | Agree                    | Neutral                  | Disagree                 | Strongly Disagree        |
|-----------------------------------------------------------------------------------------------------------------------------------------------------|--------------------------|--------------------------|--------------------------|--------------------------|--------------------------|
| Antimicrobials are overused nationally in healthcare                                                                                                | <input type="checkbox"/> |
| Antimicrobials are overused at the hospitals where I have rotated                                                                                   | <input type="checkbox"/> |
| Antimicrobial resistance is not a significant problem nationally                                                                                    | <input type="checkbox"/> |
| Antimicrobial resistance is not a significant problem at the hospitals where I have rotated                                                         | <input type="checkbox"/> |
| Better use of antimicrobials will reduce problems with antimicrobial-resistant organisms                                                            | <input type="checkbox"/> |
| Appropriate use of antimicrobials can cause antimicrobial resistance                                                                                | <input type="checkbox"/> |
| Strong knowledge of antimicrobials is important in my pharmacy career                                                                               | <input type="checkbox"/> |
| I would like more education on antimicrobial resistance                                                                                             | <input type="checkbox"/> |
| I would like more education on the appropriate use of antimicrobials                                                                                | <input type="checkbox"/> |
| New antimicrobials will be developed in the future that will keep up with the problem of "resistance"                                               | <input type="checkbox"/> |
| Prescribing broad-spectrum antimicrobials when equally effective, narrower-spectrum antimicrobials are available increases antimicrobial resistance | <input type="checkbox"/> |
| Poor Infection Control practices by healthcare professionals cause spread of antimicrobial resistance                                               | <input type="checkbox"/> |
| Inappropriate use of antimicrobials causes antimicrobial resistance                                                                                 | <input type="checkbox"/> |
| Inappropriate use of antimicrobials can harm patients                                                                                               | <input type="checkbox"/> |

---



---

**8. If made available to you, please rate the usefulness of each of the following options for learning about antimicrobial prescribing and resistance**

|                                                                                                 | Very Useful              | Useful                   | Neutral                  | Not Useful               | Not At All Useful        | N/A                      |
|-------------------------------------------------------------------------------------------------|--------------------------|--------------------------|--------------------------|--------------------------|--------------------------|--------------------------|
| Grand Rounds lectures                                                                           | <input type="checkbox"/> |
| Lecture series for pharmacy students                                                            | <input type="checkbox"/> |
| Interactive patient-oriented problem-solving modules on the internet                            | <input type="checkbox"/> |
| Interactive patient-oriented problem-solving modules on CD-ROM                                  | <input type="checkbox"/> |
| Problem-solving sessions attended by small groups of pharmacy students and residents or faculty | <input type="checkbox"/> |
| Role-playing sessions dealing with patients demanding antimicrobial therapy                     | <input type="checkbox"/> |

---



---

**9. How often do you use each of the following sources to learn about antimicrobial use and resistance?**

|                                                                    | Often                    | Sometimes                | Rarely                   | Never                    | Not Familiar             |
|--------------------------------------------------------------------|--------------------------|--------------------------|--------------------------|--------------------------|--------------------------|
| Infectious Diseases pharmacists                                    | <input type="checkbox"/> |
| Infectious Diseases physicians                                     | <input type="checkbox"/> |
| Non-infectious diseases pharmacists                                | <input type="checkbox"/> |
| Infectious Diseases Society of America Guidelines                  | <input type="checkbox"/> |
| Other guidelines by professional organizations                     | <input type="checkbox"/> |
| Hospital physicians                                                | <input type="checkbox"/> |
| Pharmaceutical representatives                                     | <input type="checkbox"/> |
| Medical/pharmacy journals                                          | <input type="checkbox"/> |
| Sanford Guide                                                      | <input type="checkbox"/> |
| Johns Hopkins Antibiotic Guide                                     | <input type="checkbox"/> |
| iPhone or smartphone apps                                          | <input type="checkbox"/> |
| Drug databases (e.g. Lexi-Comp, Micromedex, Clinical Pharmacology) | <input type="checkbox"/> |
| UpToDate                                                           | <input type="checkbox"/> |
| Wikipedia                                                          | <input type="checkbox"/> |
| Textbooks or study guides                                          | <input type="checkbox"/> |
| Peers (other students)                                             | <input type="checkbox"/> |
| Others used often (please specify)                                 | _____                    |                          |                          |                          |                          |

- 10 Have you completed an advanced pharmacy practice experience (APPE) in Infectious Diseases during pharmacy school?  Yes  No



---

---

**11. Have you attended any formal lecture(s) that address the following topics during pharmacy school?**

|                                                                              | Yes                      | No                       | I don't remember         |
|------------------------------------------------------------------------------|--------------------------|--------------------------|--------------------------|
| Rational use of antibiotics in general                                       | <input type="checkbox"/> | <input type="checkbox"/> | <input type="checkbox"/> |
| When to start antibiotics                                                    | <input type="checkbox"/> | <input type="checkbox"/> | <input type="checkbox"/> |
| How to select the correct regimen (dosing, route, and frequency)             | <input type="checkbox"/> | <input type="checkbox"/> | <input type="checkbox"/> |
| How to select the correct duration of treatment for specific infections      | <input type="checkbox"/> | <input type="checkbox"/> | <input type="checkbox"/> |
| How to monitor for efficacy and safety with the chosen antimicrobial therapy | <input type="checkbox"/> | <input type="checkbox"/> | <input type="checkbox"/> |

12 How would you rate your pharmacy education regarding appropriate use of antimicrobials so far?

- Very useful
- Useful
- Neutral
- Not useful
- Not at all useful
- I have not received any education so far

---



---

**13. How well do you feel your pharmacy education has prepared you to do the following upon graduation?**

|                                                                                                                       | Very Good                | Good                     | Average                  | Poor                     | Very Poor                | Not Familiar             |
|-----------------------------------------------------------------------------------------------------------------------|--------------------------|--------------------------|--------------------------|--------------------------|--------------------------|--------------------------|
| To know when to start antimicrobial therapy                                                                           | <input type="checkbox"/> |
| How to select the best antimicrobial for a specific infection                                                         | <input type="checkbox"/> |
| How to select an appropriate regimen (dose, route, frequency)                                                         | <input type="checkbox"/> |
| How to monitor for efficacy and safety of the chosen antimicrobial therapy                                            | <input type="checkbox"/> |
| To describe the correct spectrum of antimicrobial therapy for different antimicrobials (what is covered by each drug) | <input type="checkbox"/> |
| Understand the basic mechanisms of antimicrobial resistance                                                           | <input type="checkbox"/> |
| How to streamline or de-escalate antimicrobial therapy                                                                | <input type="checkbox"/> |
| How to interpret antibiograms                                                                                         | <input type="checkbox"/> |
| How to find reliable sources of information to treat infections                                                       | <input type="checkbox"/> |
| How to transition from intravenous to oral antimicrobials (IV to PO switch)                                           | <input type="checkbox"/> |
| How to handle a patient who demands antimicrobial therapy that is not indicated                                       | <input type="checkbox"/> |

14 When do you think your pharmacy school should spend more time teaching about the appropriate use of antimicrobials?

- First year
- Second year
- Third year
- Fourth year
- All of the above
- None of the above

---

---

**Knowledge: Please answer the following case scenarios regarding antimicrobial use and resistance**

- 15 A 50 year-old woman presents to clinic with 3 days of dysuria and feeling feverish. On exam she has a temperature of 101.8 F, her blood pressure and heart rate are normal and at her baseline. She has mild back pain and suprapubic tenderness. She is menopausal, but sexually active with only one male partner. Labs are ordered, including a urinalysis showing 80 white cells/high-powered field and positive leukocyte esterase and nitrites; culture is pending. Renal function is normal. She has never taken antibiotics before and there is no documented antimicrobial resistance to urinary pathogens in this area. You would recommend the following to the physician:
- Treat with nitrofurantoin for 14 days
  - Treat with trimethoprim/sulfamethoxazole for 14 days
  - Treat with ciprofloxacin, adjusting if the organism is resistant, and plan for a 7-day treatment course
  - Treat with vancomycin and piperacillin/tazobactam
  - Treat with vancomycin alone
  - Await culture results before starting an antimicrobial
  - Refer to a urologist

16 Which of the following antimicrobials does not cover anaerobes?

- Metronidazole
- Clindamycin
- Ampicillin/sulbactam
- Piperacillin/tazobactam
- Levofloxacin

---

---

17 A 28 year-old man is hospitalized with fevers, chills and productive cough. A chest X-ray reveals a right lower lobe infiltrate. The resident physician makes the diagnosis of community-acquired pneumonia and starts IV levofloxacin. After 24 hours, he feels better and his fever is improving, but he still has a productive cough. Blood and sputum cultures reveal *Streptococcus pneumoniae* (resistant to penicillin) and susceptible to fluoroquinolones. He is able to eat; oral absorption is good. With regards to antimicrobial therapy, what would you recommend the physician do next?

- Continue intravenous levofloxacin
- Switch to oral levofloxacin
- Switch to ampicillin/sulbactam
- Switch to piperacillin/tazobactam
- Add vancomycin
- Switch to vancomycin plus piperacillin/tazobactam

- 
- 
- 18 A 14-year old female with pharyngitis gets a prescription for 10 days of ciprofloxacin (Cipro) from a neighbor. Within 5 days of taking the antibiotic she presents to the ER with fever and more than 8 watery bowel movements over 12 hours. What do you think is the most likely cause of her diarrhea?
- Food poisoning
  - Antibiotic-associated diarrhea
  - Clostridium difficile-associated diarrhea
  - Typhoid fever
  - Non-typhoid salmonellosis associated with food contamination



---

---

19 A 78 year-old gentleman is hospitalized for elective knee replacement surgery. The orthopedist requests 5 days of postoperative prophylactic antibiotics. What are the possible risks associated with prescribing 5 days of antibiotics in this case?

- Antibiotic resistance
- It reinforces the perception that long courses of antibiotics should be prescribed for surgical prophylaxis
- Adverse drug reaction
- Clostridium difficile-associated diarrhea
- All of the above
- No real risk

---

---

**20. For each of the following combinations of antimicrobials/organisms please match the most likely mechanism of antimicrobial resistance**

|                                                      | Efflux pumps             | Alteration of binding sites | Thickening of the cell wall | Enzymatic                | Intrinsic (not acquired) |
|------------------------------------------------------|--------------------------|-----------------------------|-----------------------------|--------------------------|--------------------------|
| Beta-lactam resistance in E. coli                    | <input type="checkbox"/> | <input type="checkbox"/>    | <input type="checkbox"/>    | <input type="checkbox"/> | <input type="checkbox"/> |
| Methicillin-resistant Staphylococcus aureus (MRSA)   | <input type="checkbox"/> | <input type="checkbox"/>    | <input type="checkbox"/>    | <input type="checkbox"/> | <input type="checkbox"/> |
| Vancomycin-intermediate Staphylococcus aureus (VISA) | <input type="checkbox"/> | <input type="checkbox"/>    | <input type="checkbox"/>    | <input type="checkbox"/> | <input type="checkbox"/> |
| Cefazolin resistance in Enterococcus spp.            | <input type="checkbox"/> | <input type="checkbox"/>    | <input type="checkbox"/>    | <input type="checkbox"/> | <input type="checkbox"/> |

---

---

21 The lab calls you with a blood culture positive for extended-spectrum beta-lactamase (ESBL) E. coli. Which one is your preferred empiric antibiotic to treat this bacteremia?

- Daptomycin
- Vancomycin
- Piperacillin/tazobactam
- Vancomycin and piperacillin/tazobactam
- Ceftriaxone
- Micafungin
- Meropenem

---

---

22 According to Centers for Disease Control and Prevention (CDC) guidelines, intravenous vancomycin use is discouraged in which of the following situations?

- For the eradication of MRSA colonization
- For the treatment of methicillin-susceptible *Staphylococcus aureus* (MSSA) bacteremia in a patient on hemodialysis
- Treatment of 1 out of 4 positive blood cultures with *Staphylococcus haemolyticus* in a patient with no central lines
- All of the above
- None of the above

23 Did you use any resources to help you answer the clinical questions in this survey?

- Yes
- No

---

---

24 Are you familiar with the term "Antimicrobial Stewardship?"

- Very familiar
- Familiar
- Not familiar (I've heard the term, but am not sure what it is about)
- Not at all familiar (I've never heard it before)

25 During the course of your pharmacy education, have you ever made a recommendation(s) regarding antimicrobials directly to another clinician (e.g. physician, nurse)?

- Yes
- No

25B If so, was your recommendation(s) generally accepted?

- Yes
- No

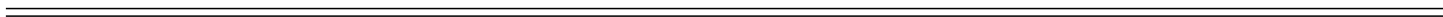

26 Almost done! Please provide any feedback here (optional):

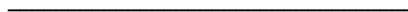

Supplement: supp_ciu537_ciu537supp.pdf [file supp_ciu537_ciu537supp.pdf]
